# Supplementary material
Source: publisher figshare collection journal article supplement (https://gsajournals.figshare.com/ndownloader/files/22620188)
Supplement: Supplementary file 1 [file 22620188]

|             |                                                                                                        |      |
|-------------|--------------------------------------------------------------------------------------------------------|------|
| CHuangzaosi | TTGTCAGTGTGTGCGGTGTATGGCAGGTTTTTGGTTCGGCAAGTGGGGCCCTCCGGGGAGGAATCTCAGTAACAAACCGCTCTTCTGAAAAGGTGACGCCA  | 100  |
| A619        | TTGTCAGTGTGTGCGGTGTATGGCAGGTTTTTGGTTCGGCAAGTGGGGCCCTCCGGGGAGGAATCTCAGTAACAAACCGCTCTTCTGAAAAGGTGACGCCA  | 100  |
| Consensus   | ttgtcagtggtgCGGTgtatggcaggtttttggttcgGCCaagtggggccctccggggaggaatctcagtaacaaacCGctcttctgaaaaggTcagGCCa  |      |
| CHuangzaosi | TCGCCGGTCCGGTCCGGTGTATGTCGTGCTGTGCTGTCTGTAGCTTTGCTGCCGATCC                                             | 200  |
| A619        | TCGCCGGTCCGGTCCGGTGTATGTCGTGCTGTGCTGTCTGTAGCTTTGCTGCCGATCC                                             | 200  |
| Consensus   | tccccggTccggTccggTgatgtcgTcgTgtcgTctgtagctTgctgccgATcc c ccccc c cccctttcttctcttacccttccctccacCTca     |      |
| CHuangzaosi | TAAATACCTTAGTTTAAATAACCTTGCACTGCCGCGAGTAGCCCTTAACCTGCTGG...TATCTATCTCTTTTCTGAAGGAAAAAAGGTTTGTATCTCTC   | 296  |
| A619        | TAAATACCTTAGTTTAAATAACCTTGCACTGCCGCGAGTAGCCCTTAACCTGCTGGTATCTATCTCTTTTCTGAAGGAAAAAAGGTTTGTATCTCTC      | 300  |
| Consensus   | taaatacttagtttaataaaccttgcactgccgCGagtagcccttaactgctgc tatctatctcttttctgaaggaaaaaaaggTttgtatactctctc   |      |
| CHuangzaosi | TACCTAGCTAGTCTGCAATGCCGCTAATGTCGCTTGCCTGTTTATTGTTCTTAATAAGGGCTGCCTATCTATTATATTTTGCACCTGTTTGTCTG        | 396  |
| A619        | TACCTAGCTAGTCTGCAATGCCGCTAATGTCGCTTGCCTGTTTATTGTTCTTAATAAGGGCTGCCTATCTATTATATTTTGCACCTGTTTGTCTG        | 400  |
| Consensus   | ta ctagc agtctctgcatgccgctAatgt cgtcttgccTgtttattgttcttaataagggctgcctatctattatattttgcacctgTtttgctg g   |      |
| CHuangzaosi | TTCTTGGTAACTAGCTTAATTCCTTGGCTACAATCGTCAAAATCCCCCCCATCATCAGTCAATGAACCTTTTGATCGAAATGAAGTTGTTCTTAATTC     | 496  |
| A619        | TTCTTGGTAACTAGCTTAATTCCTTGGCTACAATCGTCAAAATCCCCCCCATCATCAGTCAATGAACCTTTTGATCGAAATGAAGTTGTTCTTAATTC     | 500  |
| Consensus   | ttcttggttaactagcttaattctctt gctacaactgcAaatcccccccatcatcagTca atgaacttttgatcgaaTgaagTgtctctctaatttc    |      |
| CHuangzaosi | GGCCCCAGCAGCGCCCATGCACTCGGTTTTTATTGCTTTCTGTTGGGTATAAATATGCAAGACCTTTTGTGCTAGGGCAAGGCTGCAACCATCATGCGTGT  | 596  |
| A619        | GGCCCCAGCAGCGCCCATGCACTCGGTTTTTATTGCTTTCTGTTGGGTATAAATATGCAAGACCTTTTGTGCTAGGGCAAGGCTGCAACCATCATGCGTGT  | 600  |
| Consensus   | ggccccagcagcgcccatgcatctggTTTTatttgctttctgTtgggtataaatatgcaagaccttttTgtctagggcaaggctgcaaccacatgctgTgt  |      |
| CHuangzaosi | ACTGAACCTCATGATGTAACTCATCTTTTTGTTTGTCTACAGAATCACTACTCTACTGCACTTCCTTTTCATCCGATCCGCAATCTTTTTTTCCTTTTAC   | 696  |
| A619        | ACTGAACCTCATGATGTAACTCATCTTTTTGTTTGTCTACAGAATCACTACTCTACTGCACTTCCTTTTCATCCGATCCGCAATCTTTTTTTCCTTTTAC   | 700  |
| Consensus   | actgaactcatgatgttaactcatctttttgtTgtctacagaatcactactctactgcacttctctttcatccgatccgcaatctttttttttctttac    |      |
| CHuangzaosi | ATGCTTTAGTTTTCCTCTCTTTCTTGATTACAACATGATTACTGGAACCTTCTTAGGCTGCCTTCCCTTCTTGGATCTGCTTTAGTTTTCCTTTTGG      | 796  |
| A619        | ATGCTTTAGTTTTCCTCTCTTTCTTGATTACAACATGATTACTGGAACCTTCTTAGGCTGCCTTCCCTTCTTGGATCTGCTTTAGTTTTCCTTTTGG      | 800  |
| Consensus   | atgcttttagttttctctctttcttgattacaacatgattactggaactttcttaggctgccttcccttctcttggtatctgctttagttttctctttt gg |      |
| CHuangzaosi | GCTACCGCGCGCGGCTTATTGAGTTTATCACTTGTGCAATATACATAAATATATATACATGATGCGATGGCGTTCACTGTTACTCAACTACAGATCTG     | 896  |
| A619        | GCTACCGCGCGCGGCTTATTGAGTTTATCACTTGTGCAATATACATAAATATATATACATGATGCGATGGCGTTCACTGTTACTCAACTACAGATCTG     | 900  |
| Consensus   | gctacCGcgCGcggttatttgagTttatcactTgtcgatatacataaatatatatatatacatgcatgCGatggcgtTcatgttactccaactacagatctg |      |
| CHuangzaosi | TTTCTGTTCTGTTGTTTTCAGTTTCAGCGCGCAGTTAAGCATAGCAGGACGACACGACGATATATACCCCGCAGTGCAGAGCTCCTGACGATGGCGCACGAA | 996  |
| A619        | TTTCTGTTCTGTTGTTTTCAGTTTCAGCGCGCAGTTAAGCATAGCAGGACGACACGACGATATATACCCCGCAGTGCAGAGCTCCTGACGATGGCGCACGAA | 1000 |
| Consensus   | tttctgTtctgTgttttcagTtTCagcgCGcagTtaagcatagcagggacgaccacgacgat tatcaccCGcagTgcgagctcctgacgTgTggcgacgaa |      |
| CHuangzaosi | ACGCGGGACCTGGACCGCGCGCAGCGCACCTAACCGCTTCGCGCGCTGCGCAGCATCCGCGCAGAGCTGAGCTTCCACCTGCTGCATCTGCTGCAGCGCG   | 1096 |
| A619        | ACGCGGGACCTGGACCGCGCGCAGCGCACCTAACCGCTTCGCGCGCTGCGCAGCATCCGCGCAGAGCTGAGCTTCCACCTGCTGCATCTGCTGCAGCGCG   | 1100 |
| Consensus   | acgCGggaactTgaacgCGcgCGcagCGcagcttaacCGcttccggcgTgcCGagcatccCGcgagagctgagTtccactgctgcactcgctcgagCGcg   |      |
| CHuangzaosi | CGCGCGCGGTCATCCCGTTCACGCGCGCGCGCGCAGTCCACCATCGACTACTTCTCTCGCGCGCGCGATCCCCACGACGAGGCCATCGAGTACGAGCGCGT  | 1196 |
| A619        | CGCGCGCGGTCATCCCGTTCACGCGCGCGCGCGCAGTCCACCATCGACTACTTCTCTCGCGCGCGCGATCCCCACGACGAGGCCATCGAGTACGAGCGCGT  | 1200 |
| Consensus   | cggCGcggtTcaatccCGtcaCGcgCGcgCGcagTccacCATcgactacttctctcgCGcgCGcagTccccacCGcagggcTatcgatcagTcgagCGcgT  |      |
| CHuangzaosi | GGCGCGCGCGCGCGCGCGCGCACACAGTACACCATGGACATGTTCCGCGACTACTGCGCAGCGGACTACCCCGCAGCGCGGACCTGACCTCCGCGCGCAC   | 1296 |
| A619        | GGCGCGCGCGCGCGCGCGCGCACACAGTACACCATGGACATGTTCCGCGACTACTGCGCAGCGGACTACCCCGCAGCGCGGACCTGACCTCCGCGCGCAC   | 1300 |
| Consensus   | gcCGcgCGcgCGcgCGcgCGcacaCGatcacCATggacTgttccgCGactactgcgacgCG actacccccacCGcgagCGcTatcctcgCGcggaca     |      |
| CHuangzaosi | ATGACTGGAGCCCTCTGCTGTTGCGGCGCACCGCAGCAGCACTCGCGCGCTGCTCATACATGCCCGCGGCGCACTTTGAGACCTCCCGCGCGCGCACGCG   | 1396 |
| A619        | ATGACTGGAGCCCTCTGCTGTTGCGGCGCACCGCAGCAGCACTCGCGCGCTGCTCATACATGCCCGCGGCGCACTTTGAGACCTCCCGCGCGCGCACGCG   | 1400 |
| Consensus   | atgactggagccctctgTtTcggggCcacCGcagcagcagcagTcgCGcgctgcctacatgcCGcgggggcaattTgagactcccccgCGcgCGcagcg    |      |
| CHuangzaosi | CCACCGCGCGCGCGCAGGAAGCGCGCGCAGCGCGCTGCGCGCGCGGTTCCATGCTGCTGCTGGCCAGCGCGCTCGAGAAGGAGAGCAGCGCGCGCTGC     | 1496 |
| A619        | CCACCGCGCGCGCGCAGGAAGCGCGCGCAGCGCGCTGCGCGCGCGGTTCCATGCTGCTGCTGGCCAGCGCGCTCGAGAAGGAGAGCAGCGCGCGCTGC     | 1499 |
| Consensus   | ccacCGcgCGcgCGcaggaagCGggcgCGggcgTggcgCGcgCGcttccatg ctgTgctggCcaacggcgTcgagaagaaggagagcagcgCGcgCGctgc |      |
| CHuangzaosi | GGCTCACCGAGAAGTACAGCGGCTCATGCACTCATACCCAACTTACAAAGTCTGAT.....CAAACTCTCTCTTATGTTGG                      | 1577 |
| A619        | GGCTCACCGAGAAGTACAGCGGCTCATGCACTCATACCCAACTTACAAAGTCTGAT.....CAAACTCTCTCTTATGTTGG                      | 1599 |
| Consensus   | ggctcacCGagaagt ac gccctcatgcaacctatacccaagcttac aaggtctgac caaatctctctcttatgttgc                      |      |
| CHuangzaosi | TG...CATGCTTTCAAATAGTTAAAAAATTAATTACGGTT...TTGTTGTTTATTTTTGCGCACTGCAGACTGATAGGGCGAGCGTGATCTCGGA        | 1671 |
| A619        | TGTTGCTATGTTTCAAAT...AATTACGGTTTGTGTTGTTTATTTTTGCGCACTGCAGACTGATAGGGCGAGCGTGATCTCGGA                   | 1686 |
| Consensus   | tc catcgt tcaaat aattcacgTtctg ttgtgtttatttttgcgactgcagactgataggcgagcggtgatctcgga                      |      |
| CHuangzaosi | CGCGATCGAGTACATCCAGGAGCTGGGGAGGACGCTGGAGAGCTGACGCTGCTGTTGGAGAAGAAGCGCGCGCGAGGAGCTGACGGGGAGCTGCTG       | 1771 |
| A619        | CGCGATCGAGTACATCCAGGAGCTGGGGAGGACGCTGGAGAGCTGACGCTGCTGTTGGAGAAGAAGCGCGCGCGAGGAGCTGACGGGGAGCTGCTG       | 1786 |
| Consensus   | cgcgatcgagTacatccaggagctgggaggaCGgtggagagctgcagctgctgTgtggagaagaagCGcgCGcgaggagagctgcaggggagcTgctgTg   |      |
| CHuangzaosi | GACGCGCGCGCGCGCTGCGGTGTTGCTGCGCGCGCTGAGCGCGGAGAGCTCGGAGGGCGAGGTGCTCTCCGCGCGCGCGCGTGCCTGCGCGCGCGGATCC   | 1871 |
| A619        | GACGCGCGCGCGCGCTGCGGTGTTGCTGCGCGCGCTGAGCGCGGAGAGCTCGGAGGGCGAGGTGCTCTCCGCGCGCGCGCGTGCCTGCGCGCGCGGATCC   | 1886 |
| Consensus   | gacgCGcgCGcgctgcgTgTgtgTgTgcTgcCGcgCGTgagcgCGagagctcggagggcgaggtggctctctcgCGcgCGcgctgcCGcgCGcagcgatcc  |      |
| CHuangzaosi | GAGCAGCTGATCATCCAGCGCGGAGCAGGAGCAGCTCCGCTGGACGTGCGGATGTGGAGGAGGACGTGACATCAAGCTCACCAAGCGCGCGCGCGAGCG    | 1971 |
| A619        | GAGCAGCTGATCATCCAGCGCGGAGCAGGAGCAGCTCCGCTGGACGTGCGGATGTGGAGGAGGACGTGACATCAAGCTCACCAAGCGCGCGCGCGAGCG    | 1986 |
| Consensus   | g agcagctacatccagcgCGgagcaggaagcagctccgtggacgtgcggat gTggagaggaCGtgaacataagctcaccaagCGcgCGcgCGcagcg    |      |
| CHuangzaosi | GTGCTTCGCGAGCGCGTTCGCGCGCGCTGGAAGCTTCGCGCTTGAACCTCTCCGCGCGCAAGATCGGTGACTGTCAAATCTACATGTTCAAC           | 2071 |
| A619        | GTGCTTCGCGAGCGCGTTCGCGCGCGCTGGAAGCTTCGCGCTTGAACCTCTCCGCGCGCAAGATCGGTGACTGTCAAATCTACATGTTCAAC           | 2086 |
| Consensus   | gtgcctcgagcgcgTgcgcgcgcgctgga gacctccgcttgacctctgcacctctccggcggaagatcggtgactgtcaaatctacatgttcaac       |      |
| CHuangzaosi | ACCAAGGTACATACGAATACGATAGTGAACATTGATCGATCTGTAATCTGTAGCCTGACGATT.....CCGAGGTTTCT.....                   | 2147 |
| A619        | ACCAAGGTACATACGAATACGATAGTGAACATTGATCGATCTGTAATCTGTAGCCTGACGATTTCATGCATTACTTTCCGAGGTTTCTTGCTATAC       | 2186 |
| Consensus   | accaaggtacatacgaatacagata gta ccattgatcgatctgtaattctgtagcctgacgatt ccgaggtttct                         |      |
| CHuangzaosi | .....GGTGCTAAAAAATGCATCTTTTTTCTCAGATGCAATGCTTCTGCTCTTTGTTACCGCAGATTACAAAGGGGTCTTCAGTGTTTGC             | 2235 |
| A619        | TACCTAATCTGGTGTCTAAAAAATGCATCTTTTTTCTCAGATGCAATGCTTCTGCTCTTTGTTACCGCAGATTACAAAGGGGTCTTCAGTGTTTGC       | 2286 |
| Consensus   | ggtgctaaaaaatgcattcttttttc tcagatgcaaatgcttctgtctttgttcacCGcagattcacaaaggggtcttcagTgtttgc              |      |
| CHuangzaosi | GAGTGCAGTGGCGGTAGGCTGATGGAAGTGGTGGACGAGTACTAGGCTACCATGCACCTTGAATTTCTAGCTAGCTCTAC...GTACCGCGCTGCTATGAA  | 2333 |
| A619        | GAGTGCAGTGGCGGTAGGCTGATGGAAGTGGTGGACGAGTACTAGGCTACCATGCACCTTGAATTTCTAGCTAGCTCTACGTACCGCGCTGCTATGAA     | 2386 |
| Consensus   | gagTgcagTggCGgttagcTgatggagTggTggacgagTactaggtccacctgcactTgaattcttagttagctctac gtacCGcgctgctatgaa      |      |
| CHuangzaosi | CTAGCTATAGCGTTTCTTGGATGAAG...ACTAGTTAGTTGTTACCTTCTATCTTTGCTTCAATTAATCCGCTTGTCTGTTACAGACTGAGTTTGT       | 2430 |
| A619        | CTAGCTATAGCGTTTCTTGGATGAAGACTAGTTAGTTGTTACCTTCTATCTTTGCTTCAATTAATCCGCTTGTCTGTTACAGACTGAGTTTGT          | 2486 |
| Consensus   | tctagctatagcTttcttggatgaag actagttagTgttacctctctatctttgtcttcaattaaatccgctTgtcgtgttacagactgagtttgtt     |      |
| CHuangzaosi | CTAAATGTCAAGGTTGTTTGGTCAAAATGAATAAATGGCACACTGGCCTGTGAGGTTATTATATATA                                    | 2500 |
| A619        | CTAAATGTCAAGGTTGTTTGGTCAAAATGAATAAATGGCACACTGGCCTGTGAGGTTATTATATATA                                    | 2556 |
| Consensus   | tctaaatgtcaaggTgttttggTcaaatgaataaattggcacactggcctgtgaggttattatatata                                   |      |

Figure S1 Sequence alignment of GRMZM2G021276 between CHuangzaosi and A619
